# Supplementary material for: A Bioinformatic Study on the Potential Anti-Vitiligo Activity of a Carpobrotus edulis Compound
Source: MDPI journal article supplement (doi:10.3390/molecules28227545), 2023-11-11
Supplement: s1 [file s1]

Table S2. Performance Comparison of the One-Phase vs Two-Phase Alignment with the Calibration Curve Samples

| RT (min) | compound name               | One-phase alignment |       | Two-phase alignment |       |
|----------|-----------------------------|---------------------|-------|---------------------|-------|
|          |                             | SmpNr               | Score | SmpNr               | Score |
| 11.065   | Decanoic acid               | 11                  | 887   | 11                  | 893   |
| 13.443   | Laurate                     | 11                  | 855   | 11                  | 863   |
| 14.559   | Tridecanoic acid            | 11                  | 883   | 11                  | 890   |
| 16.626   | Pentadecanoic acid          | 11                  | 690   | 11                  | 836   |
| 17.481   | Palmitoleic acid            | 11                  | NA    | 11                  | 880   |
| 17.74    | Palmitic acid               | 3                   | 605   | 11                  | 819   |
| 18.852   | Heptadecanoic acid          | 2                   | 744   | 11                  | 876   |
| 19.691   | Linolic acid                | 10                  | 479   | 11                  | 798   |
| 19.768   | Linolenic acid              | 6                   | NA    | 7                   | 676   |
| 19.799   | Oleic acid                  | Nab                 | NA    | 11                  | 494   |
| 19.848   | Elaidic acid                | 3                   | 769   | 3                   | 795   |
| 20.076   | Stearic acid                | 11                  | 749   | 11                  | 914   |
| 20.464   | 8.11.14-Eicosatrienoic acid | NA                  | NA    | 11                  | 840   |
| 21.254   | Arachidonic acid            | 9                   | 750   | 11                  | 929   |
| 21.298   | Eicosapentaenoic acid       | 2                   | 651   | 11                  | 812   |
| 21.567   | 11.14-Eicosadienoic acid    | 11                  | 855   | 11                  | 882   |
| 21.601   | 11-Eicosenoic acid          | 10                  | 717   | 11                  | 880   |
| 21.773   | Arachidic acid              | 6                   | NA    | 11                  | NA    |
| 22.504   | Decosaheptaenoic acid       | 11                  | 813   | 11                  | 837   |
| Average  |                             | 8                   | 746   | 10                  | 829   |

Ten calibration curve samples were prepared at different dilutions from the original mixture of 19 fatty acid standards. These fatty acids vary in biochemical properties with different numbers of carbons and double bonds, or different double bond positions. A SmpNr refers to the total number of samples in which a compound was observed. b NA means that the corresponding metabolite was not detected with high confidence because the matching score is below the cutoff value that was set at 750.
