# Supplementary material for: A Bioinformatic Study on the Potential Anti-Vitiligo Activity of a Carpobrotus edulis Compound
Source: MDPI journal article supplement (doi:10.3390/molecules28227545), 2023-11-11
Supplement: s1 [file s1]

Table S1: The Mixed Standards (MS) used in the GC-TOF-MS procedure

| No  | Compounds                                     | ET(min) | Sample injection (ng) | NIST Score |
|-----|-----------------------------------------------|---------|-----------------------|------------|
| 1   | L-I-alanine                                   | 6.2908  | 70                    | 949        |
| 2   | L-leucine                                     | 8.51    | 105                   | 896        |
| 3   | L-Proline                                     | 8.8917  | 94                    | 762        |
| 4   | Glycine                                       | 9.0025  | 141                   | 957        |
| 5   | Succinic acid                                 | 9.13    | 94                    | 924        |
| 6   | L-Serine                                      | 9.721   | 94                    | 772        |
| 7   | pipecolinic acid                              | 9.815   | 141                   | 886        |
| 8   | beta-Alanine                                  | 10.645  | 188                   | 953        |
| 9   | 4-Hydroxy-L-proline                           | 11.8733 | 94                    | 700        |
| 10  | trans-Cinnamic acid                           | 12.2384 | 188                   | 866        |
| 11  | L-cysteine                                    | 12.248  | 94                    | 0          |
| 12  | creatinine, anhydrous                         | 12.248  | 141                   | 937        |
| 13  | !-Ketoglutaric acid                           | 12.5142 | 188                   | 933        |
| 14  | L-asparate                                    | 12.605  | 188                   | 954        |
| 15  | L-Phenylalanine                               | 13.1708 | 141                   | 604        |
| 16  | n-Dodecanoic acid                             | 13.5467 | 141                   | 864        |
| 17  | L-(+)-Arabionse                               | 13.5758 | 141                   | 736        |
| 18  | DL-Homocysteine                               | 13.6375 | 281                   | 822        |
| 19  | L-Asparagine                                  | 13.457  | 188                   | 797        |
| 20* | L-(+)-Rhamnose monohydrate                    | 14.3375 | 141                   | 910        |
|     |                                               | 14.4433 |                       | 876        |
| 21  | L-(-)-arabitol                                | 14.3833 | 234                   | 952        |
| 22  | 1,4-diaminobutane                             | 14.675  | 117                   | 938        |
| 23  | L—Ornithine monohydrochloride                 | 15.8158 | 234                   | 718        |
| 24  | 1,5-Diaminopentane dihydrochloride/Cadaverine | 16.13   | 281                   | 947        |
| 25  | n-Tetradecanoic acid(myristic acid)           | 16.3825 | 141                   | 548        |

|         |                                 |          |     |            |
|---------|---------------------------------|----------|-----|------------|
| 26*     | D-Fructose                      | 16.6117  | 141 | 940        |
|         |                                 | 16.7575  |     | 943        |
| 27      | L-Histidine                     | 17.3875  | 281 | 766        |
| 28      | Indol-3-acetic acid             | 18.1075  | 188 | 925        |
| 29      | Palmitic acid/hexadecanoic acid | 19.5183  | 234 | 938        |
| 30      | Dopamine hydrochloride          | 19.9408  | 234 | 946        |
| 31      | 3-indolepropionic acid          | 20.0175  | 117 | 938        |
| 32      | Oleic acid                      | 22.2967  | 281 | 946        |
| 33      | n-Octadecanoic acid             | 22.7617  | 469 | 956        |
| 34      | uridine                         | 25.36    | 375 | 803        |
| 35      | n-Eicosanoic acid               | 25.3725  | 703 | 912        |
| 36      | Sucrose                         | 26.7083  | 234 | 950        |
| 37      | estradiol                       | 27.1392  | 375 | 955        |
| 38*     | Testosterone                    | 27.3892, | 938 | 967        |
|         |                                 | 27.4458  |     | 973        |
| Average |                                 |          |     | 855.097561 |

Mixed Standards (MS) Samples: 38 standard compounds were carefully selected and mixed with known ratios. Criteria for selecting those compounds are the following. (i) They should contain different classes of compounds that include amino acids, retention times of compounds are spaced across the entire 30-minute time range.
