# Supplementary material for: A Bioinformatic Study on the Potential Anti-Vitiligo Activity of a Carpobrotus edulis Compound
Source: Molecules. 2023 Nov 11;28(22):7545. doi: 10.3390/molecules28227545 (PMC10673461; doi:10.3390/molecules28227545)
Supplement: Supplementary file 1 [file molecules-28-07545-s001.zip]

Archive with 4 entries (4 files):
- Figure S1.pdf
- Table S1.pdf
- Table S2.pdf
- Table S3.ods
