# Supplementary material for: A Bioinformatic Study on the Potential Anti-Vitiligo Activity of a Carpobrotus edulis Compound
Source: Molecules. 2023 Nov 11;28(22):7545. doi: 10.3390/molecules28227545 (PMC10673461; doi:10.3390/molecules28227545)
Supplement: Supplementary file 1 [file molecules-28-07545-s001.zip › Table S3.ods]

## Sheet: fleur_acetone_CH
			Source/	Start/	End/	Area/	Width/	% Area/
			Formula	CAS	MF	RMF	Exact mass	Library
1.0183			DBC TIC	1.0021	1.0521	1.34761E+07	0.05	0.4355
	Disiloxane, hexamethyl-		C6H18OSi2	107-46-0	764	873	162.09	essentiial oils|fiehn-pct-2013.hp|mainlib
1.0683			DBC TIC	1.0521	1.0896	2.21563E+06	0.0375	0.0716
	Ethane, 2-chloro-1,1-dimethoxy-		C4H9ClO2	97-97-2	653	731	124.029	essentiial oils|fiehn-pct-2013.hp|mainlib
1.148			DBC TIC	1.0896	1.1937	3.67411E+08	0.1042	11.873
	Acetamide, 2,2,2-trifluoro-N-methyl-		C3H4F3NO	815-06-5	747	788	127.024	essentiial oils|fiehn-pct-2013.hp|mainlib
1.2443			DBC TIC	1.1937	1.3354	5.02813E+08	0.1417	16.2486
	Pyridine		C5H5N	110-86-1	821	834	79.042	essentiial oils|fiehn-pct-2013.hp|mainlib
1.8919			DBC TIC	1.8479	1.9187	82271	0.0708	0.0027
	Propane, 1,1-dimethoxy-		C5H12O2	4744-10-9	698	760	104.084	essentiial oils|fiehn-pct-2013.hp|mainlib
2.34			DBC TIC	2.2604	2.3729	2.48021E+05	0.1125	0.008
	Pyridine		C5H5N	110-86-1	838	859	79.042	essentiial oils|fiehn-pct-2013.hp|mainlib
2.7672			DBC TIC	2.7437	2.8229	1.29056E+07	0.0792	0.417
	Propane, 2-ethoxy-2-methyl-		C6H14O	637-92-3	706	744	102.104	essentiial oils|fiehn-pct-2013.hp|mainlib
3.5025			DBC TIC	3.4771	3.5896	7.4098E+05	0.1125	0.0239
	Ethanol, 2-(trimethylsilyl)-		C5H14OSi	2916-68-9	739	766	118.081	essentiial oils|fiehn-pct-2013.hp|mainlib
3.6472			DBC TIC	3.5896	3.6687	95280	0.0792	0.0031
	2-Aminocyanoacetamide		C3H5N3O	6719-21-7	881	881	99.043	essentiial oils|fiehn-pct-2013.hp|mainlib
4.276			DBC TIC	4.2604	4.3021	92089	0.0417	0.003
	Propane, 1,1-dimethoxy-		C5H12O2	4744-10-9	663	767	104.084	essentiial oils|fiehn-pct-2013.hp|mainlib
4.6533			DBC TIC	4.6104	4.6687	1.86814E+05	0.0583	0.006
	Ethanol, 2-(trimethylsilyl)-		C5H14OSi	2916-68-9	679	740	118.081	essentiial oils|fiehn-pct-2013.hp|mainlib
5.7004			DBC TIC	5.6771	5.7271	3.2187E+05	0.05	0.0104
	[998] phenylacetaldehyde 1 [8.623]		C8H8O	122-78-1	736	811	120.058	essentiial oils|fiehn-pct-2013.hp|mainlib
	[998] phenylacetaldehyde 2 [8.709]		C8H8O	122-78-1	730	809	120.058	essentiial oils|fiehn-pct-2013.hp|mainlib
5.789			DBC TIC	5.7646	5.8312	2.19374E+05	0.0667	0.0071
	[998] phenylacetaldehyde 2 [8.709]		C8H8O	122-78-1	811	822	120.058	essentiial oils|fiehn-pct-2013.hp|mainlib
	[998] phenylacetaldehyde 1 [8.623]		C8H8O	122-78-1	791	800	120.058	essentiial oils|fiehn-pct-2013.hp|mainlib
5.9952			DBC TIC	5.9729	6.0937	2.63567E+05	0.1208	0.0085
	3,4-Dihydroxy-5-methyl-dihydrofuran-2-one		C5H8O4	5803-57-6	766	771	132.042	essentiial oils|fiehn-pct-2013.hp|mainlib
7.3594			DBC TIC	7.3229	7.3812	2.05445E+05	0.0583	0.0066
	Phenol, 4-(pentyloxy)-		C11H16O2	18979-53-8	621	703	180.115	essentiial oils|fiehn-pct-2013.hp|mainlib
7.4834			DBC TIC	7.4146	7.5271	3.56426E+06	0.1125	0.1152
	[1110] succinic acid [10.517]		C4H6O4	29915-38-6	847	850	118.027	essentiial oils|fiehn-pct-2013.hp|mainlib
7.7273			DBC TIC	7.7021	7.7937	2.04418E+06	0.0917	0.0661
	2-Methoxy-4-vinylphenol		C9H10O2	7786-61-0	863	864	150.068	essentiial oils|fiehn-pct-2013.hp|mainlib
	20.59 Guaiacol<para-vinyl->		C9H10O2	7786-61-0	831	832	150.068	essentiial oils|fiehn-pct-2013.hp|mainlib
8.3403			DBC TIC	8.3021	8.4354	1.14626E+06	0.1333	0.037
	Butanoic acid, 2,3-dihydroxypropyl ester		C7H14O4	557-25-5	609	713	162.089	essentiial oils|fiehn-pct-2013.hp|mainlib
8.8252			DBC TIC	8.7937	8.8437	5.41819E+05	0.05	0.0175
	β-D-Glucopyranose, 1,6-anhydro-		C6H10O5	498-07-7	781	784	162.053	essentiial oils|fiehn-pct-2013.hp|mainlib
9.4876			DBC TIC	9.4687	9.5396	2.19898E+05	0.0708	0.0071
	Propane, 1,1-dimethoxy-		C5H12O2	4744-10-9	682	782	104.084	essentiial oils|fiehn-pct-2013.hp|mainlib
9.5617			DBC TIC	9.5396	9.5937	5.33624E+05	0.0542	0.0172
	Phenol, 2-methoxy-4-propyl-		C10H14O2	2785-87-7	747	774	166.099	essentiial oils|fiehn-pct-2013.hp|mainlib
	23.15 Eugenol <dihydro->		C10H14O2	2785-87-7	733	748	166.099	essentiial oils|fiehn-pct-2013.hp|mainlib
9.6284			DBC TIC	9.5937	9.6729	5.46567E+05	0.0792	0.0177
	1-(1'-pyrrolidinyl)-2-butanone		C8H15NO		831	875	141.115	essentiial oils|fiehn-pct-2013.hp|mainlib
9.9299			DBC TIC	9.8979	9.9479	51459	0.05	0.0017
	2H-Pyran-2-one, 5,6-dihydro-6-propyl-		C8H12O2	16400-69-4	777	843	140.084	essentiial oils|fiehn-pct-2013.hp|mainlib
10.2116			DBC TIC	10.1896	10.2562	7.48483E+05	0.0667	0.0242
	2,4-Di-tert-butylphenol		C14H22O	96-76-4	778	780	206.167	essentiial oils|fiehn-pct-2013.hp|mainlib
10.3759			DBC TIC	10.3312	10.5021	1.16462E+07	0.1708	0.3764
	β-D-Glucopyranose, 1,6-anhydro-		C6H10O5	498-07-7	884	894	162.053	essentiial oils|fiehn-pct-2013.hp|mainlib
10.8967			DBC TIC	10.8479	10.9521	1.40992E+06	0.1042	0.0456
	31.47 Dodecanoic acid		C12H24O2	143-07-7	796	819	200.178	essentiial oils|fiehn-pct-2013.hp|mainlib
	Dodecanoic acid		C12H24O2	143-07-7	778	800	200.178	essentiial oils|fiehn-pct-2013.hp|mainlib
11.0139			DBC TIC	10.9937	11.0437	2.41274E+05	0.05	0.0078
	[8400] benzoin 2 [17.135]		C14H12O2	119-53-9	607	641	212.084	essentiial oils|fiehn-pct-2013.hp|mainlib
11.0752			DBC TIC	11.0437	11.1437	1.72695E+06	0.1	0.0558
	3-Hydroxy-4-methoxybenzoic acid		C8H8O4	645-08-9	743	823	168.042	essentiial oils|fiehn-pct-2013.hp|mainlib
12.1756			DBC TIC	12.1396	12.1896	92925	0.05	0.003
	2,6-Dimethoxyhydroquinone		C8H10O4	15233-65-5	624	670	170.058	essentiial oils|fiehn-pct-2013.hp|mainlib
12.2785			DBC TIC	12.1896	12.3937	2.13597E+07	0.2042	0.6902
	1,3,5-Benzenetriol		C6H6O3	108-73-6	891	909	126.032	essentiial oils|fiehn-pct-2013.hp|mainlib
13.3975			DBC TIC	13.3604	13.4271	2.03001E+07	0.0667	0.656
	D-Pinitol, pentakis(trimethylsilyl) ether		C22H54O6Si5		778	778	554.277	essentiial oils|fiehn-pct-2013.hp|mainlib
15.0598			DBC TIC	14.9896	15.1521	1.1382E+08	0.1625	3.6781
	n-Hexadecanoic acid		C16H32O2	57-10-3	858	859	256.24	essentiial oils|fiehn-pct-2013.hp|mainlib
	45.95 Hexadecanoic acid		C16H32O2	57-10-3	847	861	256.24	essentiial oils|fiehn-pct-2013.hp|mainlib
15.2806			DBC TIC	15.2521	15.3021	3.47387E+05	0.05	0.0112
	2-Heptanone, 6-(3,5-dimethyl-2-furanyl)-6-methyl-		C14H22O2	90165-09-6	636	652	222.162	essentiial oils|fiehn-pct-2013.hp|mainlib
15.3178			DBC TIC	15.3021	15.3479	2.42007E+05	0.0458	0.0078
	[74840] N- carbobenzoxy-L-leucine 1 [19.034]		C14H19NO4	2018-66-8	742	953	265.131	essentiial oils|fiehn-pct-2013.hp|mainlib
15.4344			DBC TIC	15.4104	15.4562	2.91449E+05	0.0458	0.0094
	1-(benzo[d][1,3]dioxol-4-yl)butan-1-one		C11H12O3		621	681	192.079	essentiial oils|fiehn-pct-2013.hp|mainlib
15.5306			DBC TIC	15.4562	15.6479	4.85033E+06	0.1917	0.1567
	[985] palmitic acid [18.885]		C16H32O2	64519-82-0	759	760	256.24	essentiial oils|fiehn-pct-2013.hp|mainlib
16.0219			DBC TIC	16.0021	16.0812	5.16999E+06	0.0792	0.1671
	Phytol		C20H40O	150-86-7	866	866	296.308	essentiial oils|fiehn-pct-2013.hp|mainlib
	45.37 Phytol		C20H40O	150-86-7	793	793	296.308	essentiial oils|fiehn-pct-2013.hp|mainlib
16.3735			DBC TIC	16.3521	16.4687	1.58817E+07	0.1167	0.5132
	Octadecanoic acid		C18H36O2	57-11-4	858	859	284.272	essentiial oils|fiehn-pct-2013.hp|mainlib
16.5498			DBC TIC	16.5104	16.5646	2.56995E+06	0.0542	0.083
	[5280450] linoleic acid [20.444]		C18H32O2	60-33-3	698	703	280.24	essentiial oils|fiehn-pct-2013.hp|mainlib
16.6604			DBC TIC	16.6187	16.6896	3.55578E+06	0.0708	0.1149
	Phenol, 4,4'-(1-methylethylidene)bis-		C15H16O2	80-05-7	835	856	228.115	essentiial oils|fiehn-pct-2013.hp|mainlib
16.7014			DBC TIC	16.6896	16.7187	2.96042E+05	0.0292	0.0096
	[8215] behenic acid [23.956]		C22H44O2	112-85-6	569	636	340.334	essentiial oils|fiehn-pct-2013.hp|mainlib
17.1522			DBC TIC	17.1312	17.1729	3.19103E+05	0.0417	0.0103
	Phosphorus pentafluoride		F5P	7647-19-0	793	914	125.966	essentiial oils|fiehn-pct-2013.hp|mainlib
17.4046			DBC TIC	17.3896	17.4312	1.90411E+06	0.0417	0.0615
	Eicosanoic acid		C20H40O2	506-30-9	798	804	312.303	essentiial oils|fiehn-pct-2013.hp|mainlib
18.1655			DBC TIC	18.1479	18.1937	2.15822E+07	0.0458	0.6974
	[8343] dioctyl phthalate [23.116]		C24H38O4	117-81-7	901	903	390.277	essentiial oils|fiehn-pct-2013.hp|mainlib
	Bis(2-ethylhexyl) phthalate		C24H38O4	117-81-7	857	859	390.277	essentiial oils|fiehn-pct-2013.hp|mainlib
18.3047			DBC TIC	18.2729	18.3562	2.61124E+06	0.0833	0.0844
	Docosanoic acid		C22H44O2	112-85-6	771	785	340.334	essentiial oils|fiehn-pct-2013.hp|mainlib
18.5335			DBC TIC	18.5062	18.5479	1.76968E+05	0.0417	0.0057
	[8215] behenic acid [23.956]		C22H44O2	112-85-6	631	724	340.334	essentiial oils|fiehn-pct-2013.hp|mainlib
21.718			DBC TIC	21.6687	21.8354	2.36328E+07	0.1667	0.7637
	γ-Tocopherol		C28H48O2	7616-22-0	805	805	416.365	essentiial oils|fiehn-pct-2013.hp|mainlib
23.5991			DBC TIC	23.5271	23.7021	4.75537E+05	0.175	0.0154
	[8215] behenic acid [23.956]		C22H44O2	112-85-6	566	673	340.334	essentiial oils|fiehn-pct-2013.hp|mainlib
24.1498			DBC TIC	24.0687	24.2521	3.19549E+07	0.1833	1.0326
	Campesterol		C28H48O	474-62-4	812	814	400.371	essentiial oils|fiehn-pct-2013.hp|mainlib
25.3665			DBC TIC	25.2229	25.4521	9.46202E+06	0.2292	0.3058
	[5321342] beta-sitosterol [28.925]		C29H50O	83-46-5	704	719	414.386	essentiial oils|fiehn-pct-2013.hp|mainlib
25.5689			DBC TIC	25.4521	25.7187	2.54168E+08	0.2667	8.2135
	β-Sitosterol		C29H50O	83-46-5	800	808	414.386	essentiial oils|fiehn-pct-2013.hp|mainlib
26.4055			DBC TIC	26.2687	26.5021	6.90492E+07	0.2333	2.2314
	β-Amyrin		C30H50O	559-70-6	866	867	426.386	essentiial oils|fiehn-pct-2013.hp|mainlib
27.3894			DBC TIC	27.2687	27.4854	1.00525E+08	0.2167	3.2485
	α-Amyrin		C30H50O	638-95-9	850	852	426.386	essentiial oils|fiehn-pct-2013.hp|mainlib
28.0835			DBC TIC	28.0562	28.1479	3.80007E+05	0.0917	0.0123
	dl-α-Tocopherol		C29H50O2	10191-41-0	629	647	430.381	essentiial oils|fiehn-pct-2013.hp|mainlib

## Sheet: Leaf_acetone_CH
			Source/	Start/	End/	Area/	Width/	% Area/
			Formula	CAS	MF	RMF	Exact mass	Library
1.0197			DBC TIC	1.0021	1.0396	4.86034E+07	0.0375	1.0249
	Disiloxane, hexamethyl-		C6H18OSi2	107-46-0	859	887	162.09	essentiial oils|fiehn-2013.l|mainlib
1.0715			DBC TIC	1.0396	1.1104	3.75524E+06	0.0708	0.0792
	Ethane, 2-chloro-1,1-dimethoxy-		C4H9ClO2	97-97-2	664	778	124.029	essentiial oils|fiehn-2013.l|mainlib
1.1443			DBC TIC	1.1104	1.1937	5.84441E+08	0.0833	12.324
	Acetamide, 2,2,2-trifluoro-N-methyl-		C3H4F3NO	815-06-5	735	778	127.024	essentiial oils|fiehn-2013.l|mainlib
1.2432			DBC TIC	1.1937	1.3604	7.58525E+08	0.1667	15.9949
	Pyridine		C5H5N	110-86-1	822	835	79.042	essentiial oils|fiehn-2013.l|mainlib
1.599			DBC TIC	1.5937	1.6479	1.40857E+05	0.0542	0.003
	Ethane, 2-chloro-1,1-dimethoxy-		C4H9ClO2	97-97-2	601	640	124.029	essentiial oils|fiehn-2013.l|mainlib
1.942			DBC TIC	1.9021	1.9646	1.48675E+05	0.0625	0.0031
	Isopropyl alcohol, TMS derivative		C6H16OSi	1825-64-5	694	698	132.097	essentiial oils|fiehn-2013.l|mainlib
2.3296			DBC TIC	2.2604	2.3396	1.73964E+05	0.0792	0.0037
	Pyridine		C5H5N	110-86-1	877	890	79.042	essentiial oils|fiehn-2013.l|mainlib
2.3523			DBC TIC	2.3396	2.3854	1.94457E+05	0.0458	0.0041
	Pyridine		C5H5N	110-86-1	755	813	79.042	essentiial oils|fiehn-2013.l|mainlib
2.5834			DBC TIC	2.5562	2.6479	1.10329E+05	0.0917	0.0023
	2,3-Dioxabicyclo[2.2.1]heptane		C5H8O2	279-35-6	623	741	100.052	essentiial oils|fiehn-2013.l|mainlib
2.7687			DBC TIC	2.7437	2.8229	4.14658E+07	0.0792	0.8744
	Propane, 2-ethoxy-2-methyl-		C6H14O	637-92-3	697	744	102.104	essentiial oils|fiehn-2013.l|mainlib
3.0936			DBC TIC	3.0187	3.2437	3.55275E+05	0.225	0.0075
	Glycerin		C3H8O3	56-81-5	654	711	92.047	essentiial oils|fiehn-2013.l|mainlib
	6.35 Glycerol		C3H8O3	56-81-5	647	700	92.047	essentiial oils|fiehn-2013.l|mainlib
3.359			DBC TIC	3.3396	3.3896	63771	0.05	0.0013
	Diisopropyl azodicarboxylate		C8H14N2O4	2446-83-5	603	642	202.095	essentiial oils|fiehn-2013.l|mainlib
3.5035			DBC TIC	3.4812	3.5437	2.92804E+05	0.0625	0.0062
	Ethanol, 2-(trimethylsilyl)-		C5H14OSi	2916-68-9	774	803	118.081	essentiial oils|fiehn-2013.l|mainlib
3.7251			DBC TIC	3.7021	3.7562	1.98695E+05	0.0542	0.0042
	Isobutylamine		C4H11N	78-81-9	636	852	73.089	essentiial oils|fiehn-2013.l|mainlib
3.8773			DBC TIC	3.8146	3.9187	1.99891E+05	0.1042	0.0042
	Ethylene glycol, TMS derivative		C5H14O2Si	4403-13-8	703	732	134.076	essentiial oils|fiehn-2013.l|mainlib
3.9403			DBC TIC	3.9187	3.9646	66044	0.0458	0.0014
	Ethanol, 2-(trimethylsilyl)-		C5H14OSi	2916-68-9	659	713	118.081	essentiial oils|fiehn-2013.l|mainlib
4.3526			DBC TIC	4.3104	4.3979	2.60361E+05	0.0875	0.0055
	Propane, 1,1-dimethoxy-		C5H12O2	4744-10-9	675	718	104.084	essentiial oils|fiehn-2013.l|mainlib
4.4207			DBC TIC	4.3979	4.4479	1.20247E+05	0.05	0.0025
	Propane, 1,1-dimethoxy-		C5H12O2	4744-10-9	654	748	104.084	essentiial oils|fiehn-2013.l|mainlib
4.9217			DBC TIC	4.9021	4.9312	77945	0.0292	0.0016
	Methane, dipropoxy-		C7H16O2	505-84-0	669	731	132.115	essentiial oils|fiehn-2013.l|mainlib
6.6553			DBC TIC	6.5937	6.6646	1.06782E+06	0.0708	0.0225
	Ethanol, 2-(trimethylsilyl)-		C5H14OSi	2916-68-9	634	762	118.081	essentiial oils|fiehn-2013.l|mainlib
6.6856			DBC TIC	6.6646	6.7479	1.56009E+06	0.0833	0.0329
	Ethanol, 2-(trimethylsilyl)-		C5H14OSi	2916-68-9	646	760	118.081	essentiial oils|fiehn-2013.l|mainlib
7.479			DBC TIC	7.4146	7.5312	1.96944E+06	0.1167	0.0415
	Butanedioic acid, 2TMS derivative		C10H22O4Si2	40309-57-7	788	788	262.106	essentiial oils|fiehn-2013.l|mainlib
8.9395			DBC TIC	8.9146	9.0354	1.03624E+05	0.1208	0.0022
	Methane, dipropoxy-		C7H16O2	505-84-0	630	680	132.115	essentiial oils|fiehn-2013.l|mainlib
9.2548			DBC TIC	9.2187	9.3062	1.04972E+05	0.0875	0.0022
	Ethanol, 2-(trimethylsilyl)-		C5H14OSi	2916-68-9	666	754	118.081	essentiial oils|fiehn-2013.l|mainlib
10.2038			DBC TIC	10.1604	10.2271	1.01199E+06	0.0667	0.0213
	2,4-Di-tert-butylphenol		C14H22O	96-76-4	855	855	206.167	essentiial oils|fiehn-2013.l|mainlib
10.333			DBC TIC	10.2854	10.4521	4.91897E+06	0.1667	0.1037
	β-D-Glucopyranose, 1,6-anhydro-		C6H10O5	498-07-7	890	896	162.053	essentiial oils|fiehn-2013.l|mainlib
10.6865			DBC TIC	10.6604	10.7062	2.51987E+05	0.0458	0.0053
	2(4H)-Benzofuranone, 5,6,7,7a-tetrahydro-4,4,7a-trimethyl-		C11H16O2	15356-74-8	788	828	180.115	essentiial oils|fiehn-2013.l|mainlib
10.8792			DBC TIC	10.8396	10.9604	1.80252E+06	0.1208	0.038
	31.47 Dodecanoic acid		C12H24O2	143-07-7	853	860	200.178	essentiial oils|fiehn-2013.l|mainlib
	Dodecanoic acid		C12H24O2	143-07-7	781	785	200.178	essentiial oils|fiehn-2013.l|mainlib
11.3405			DBC TIC	11.2812	11.4479	1.31255E+06	0.1667	0.0277
	4-Hydroxybenzoic acid, TBDMS derivative		C13H20O3Si		742	748	252.118	essentiial oils|fiehn-2013.l|mainlib
11.4683			DBC TIC	11.4479	11.4812	52006	0.0333	0.0011
	1,3-Dioxolane, 4-methyl-2-(2-methylpropyl)-		C8H16O2	18433-93-7	579	649	144.115	essentiial oils|fiehn-2013.l|mainlib
11.767			DBC TIC	11.7354	11.8062	8.60389E+05	0.0708	0.0181
	Dodecanoic acid, TMS derivative		C15H32O2Si	55520-95-1	595	663	272.217	essentiial oils|fiehn-2013.l|mainlib
11.8664			DBC TIC	11.8062	11.9896	1.20808E+07	0.1833	0.2547
	Phloroglucinol, trimethylsilyl ether		C9H14O3Si	134273-02-2	797	822	198.071	essentiial oils|fiehn-2013.l|mainlib
12.0052			DBC TIC	11.9896	12.0812	2.37157E+05	0.0917	0.005
	Guanidine, 2-methoxy-1-(4,6-dimethyl-2-pyrimidyl)-		C8H13N5O	94828-32-7	612	672	195.112	essentiial oils|fiehn-2013.l|mainlib
12.1636			DBC TIC	12.1229	12.2021	2.49662E+05	0.0792	0.0053
	2,6-Dimethoxyhydroquinone		C8H10O4	15233-65-5	680	706	170.058	essentiial oils|fiehn-2013.l|mainlib
13.3993			DBC TIC	13.3604	13.4479	1.57335E+08	0.0875	3.3177
	D-Pinitol, pentakis(trimethylsilyl) ether		C22H54O6Si5		823	823	554.277	essentiial oils|fiehn-2013.l|mainlib
13.4616			DBC TIC	13.4479	13.4771	1.0629E+05	0.0292	0.0022
	5-Methyl-1-heptanol		C8H18O	7212-53-5	777	806	130.136	essentiial oils|fiehn-2013.l|mainlib
13.8864			DBC TIC	13.8687	13.9396	7.92021E+06	0.0708	0.167
	Myristic acid, TMS derivative		C17H36O2Si	18603-17-3	755	756	300.248	essentiial oils|fiehn-2013.l|mainlib
15.0412			DBC TIC	14.9729	15.1396	5.42763E+07	0.1667	1.1445
	n-Hexadecanoic acid		C16H32O2	57-10-3	812	820	256.24	essentiial oils|fiehn-2013.l|mainlib
	45.95 Hexadecanoic acid		C16H32O2	57-10-3	804	828	256.24	essentiial oils|fiehn-2013.l|mainlib
15.4269			DBC TIC	15.3979	15.4521	3.68634E+05	0.0542	0.0078
	1-(benzo[d][1,3]dioxol-4-yl)butan-1-one		C11H12O3		668	738	192.079	essentiial oils|fiehn-2013.l|mainlib
15.5327			DBC TIC	15.4521	15.6521	4.72311E+07	0.2	0.996
	Palmitic Acid, TMS derivative		C19H40O2Si	55520-89-3	817	817	328.28	essentiial oils|fiehn-2013.l|mainlib
16.0182			DBC TIC	15.9854	16.0896	2.92146E+07	0.1042	0.616
	Phytol		C20H40O	150-86-7	892	893	296.308	essentiial oils|fiehn-2013.l|mainlib
	45.37 Phytol		C20H40O	150-86-7	799	800	296.308	essentiial oils|fiehn-2013.l|mainlib
16.1251			DBC TIC	16.0896	16.1354	81223	0.0458	0.0017
	Heptane, 2,2,3,3,5,6,6-heptamethyl-		C14H30	7225-67-4	666	746	198.235	essentiial oils|fiehn-2013.l|mainlib
16.2928			DBC TIC	16.2771	16.3437	2.37247E+07	0.0667	0.5003
	Phytol, TMS derivative		C23H48OSi	57397-39-4	815	815	368.347	essentiial oils|fiehn-2013.l|mainlib
16.3623			DBC TIC	16.3437	16.4229	5.81802E+06	0.0792	0.1227
	Octadecanoic acid		C18H36O2	57-11-4	822	822	284.272	essentiial oils|fiehn-2013.l|mainlib
16.553			DBC TIC	16.5104	16.5646	1.5982E+07	0.0542	0.337
	9,12-Octadecadienoic acid (Z,Z)-, TMS derivative		C21H40O2Si	56259-07-5	832	840	352.28	essentiial oils|fiehn-2013.l|mainlib
16.7057			DBC TIC	16.6729	16.7354	1.06302E+07	0.0625	0.2242
	Stearic acid, TMS derivative		C21H44O2Si	18748-91-9	825	825	356.311	essentiial oils|fiehn-2013.l|mainlib
17.6576			DBC TIC	17.6187	17.6771	4.72567E+06	0.0583	0.0996
	Arachidic acid, TMS derivative		C23H48O2Si	55530-70-6	750	766	384.342	essentiial oils|fiehn-2013.l|mainlib
17.7423			DBC TIC	17.7146	17.7562	4.14052E+05	0.0417	0.0087
	Pyrrolo[1,2-a]pyrazine-1,4-dione, hexahydro-3-(phenylmethyl)-		C14H16N2O2	14705-60-3	568	667	244.121	essentiial oils|fiehn-2013.l|mainlib
18.1634			DBC TIC	18.1479	18.1979	2.38541E+07	0.05	0.503
	Bis(2-ethylhexyl) phthalate		C24H38O4	117-81-7	859	865	390.277	essentiial oils|fiehn-2013.l|mainlib
18.2515			DBC TIC	18.2271	18.2854	1.48423E+07	0.0583	0.313
	Uvaol, 2O-TMS		C36H66O2Si2		683	683	586.46	essentiial oils|fiehn-2013.l|mainlib
18.5362			DBC TIC	18.4896	18.5729	4.8229E+06	0.0833	0.1017
	Behenic acid, TMS derivative		C25H52O2Si	74367-36-5	719	721	412.374	essentiial oils|fiehn-2013.l|mainlib
18.9223			DBC TIC	18.8812	18.9396	6.65844E+07	0.0583	1.4041
	Oleanolic acid 2TMS		C36H64O3Si2	105986-48-9	787	791	600.439	essentiial oils|fiehn-2013.l|mainlib
18.9562			DBC TIC	18.9396	19.0229	5.90431E+07	0.0833	1.245
	Oleanolic acid 2TMS		C36H64O3Si2	105986-48-9	795	796	600.439	essentiial oils|fiehn-2013.l|mainlib
19.0763			DBC TIC	19.0229	19.1229	9.9616E+06	0.1	0.2101
	Tetracosanol, O-TMS		C27H58OSi	391679-84-8	652	670	426.426	essentiial oils|fiehn-2013.l|mainlib
19.5748			DBC TIC	19.4771	19.6104	3.90389E+07	0.1333	0.8232
	Squalene		C30H50	111-02-4	892	895	410.391	essentiial oils|fiehn-2013.l|mainlib
19.6428			DBC TIC	19.6104	19.7229	5.54516E+06	0.1125	0.1169
	Lignoceric acid, TMS derivative		C27H56O2Si	74367-37-6	628	663	440.405	essentiial oils|fiehn-2013.l|mainlib
20.111			DBC TIC	20.0646	20.1521	1.13257E+08	0.0875	2.3882
	5α-CHOLESTANE		C27H48		818	834	372.376	essentiial oils|fiehn-2013.l|mainlib
20.3779			DBC TIC	20.3062	20.4396	2.1902E+07	0.1333	0.4618
	1-Hexacosanol, TMS derivative		C29H62OSi	391679-86-0	718	722	454.457	essentiial oils|fiehn-2013.l|mainlib
20.7096			DBC TIC	20.6604	20.7562	5.14742E+06	0.0958	0.1085
	δ-Tocopherol		C27H46O2	119-13-1	689	705	402.35	essentiial oils|fiehn-2013.l|mainlib
20.9125			DBC TIC	20.8687	20.9896	1.25962E+07	0.1208	0.2656
	γ-Tocopherol, TMS derivative		C31H56O2Si	2733-27-9	696	697	488.405	essentiial oils|fiehn-2013.l|mainlib
21.7083			DBC TIC	21.6312	21.8312	6.26831E+07	0.2	1.3218
	γ-Tocopherol		C28H48O2	7616-22-0	663	663	416.365	essentiial oils|fiehn-2013.l|mainlib
22.3107			DBC TIC	22.2104	22.3646	4.11923E+07	0.1542	0.8686
	1-Octacosanol, TMS derivative		C31H66OSi	959269-04-6	742	745	482.488	essentiial oils|fiehn-2013.l|mainlib
22.3925			DBC TIC	22.3646	22.4562	1.27761E+06	0.0917	0.0269
	α-Tocopherol, TMS derivative		C32H58O2Si	52760-33-5	600	617	502.421	essentiial oils|fiehn-2013.l|mainlib
22.58			DBC TIC	22.4771	22.6521	8.07422E+07	0.175	1.7026
	dl-α-Tocopherol		C29H50O2	10191-41-0	715	717	430.381	essentiial oils|fiehn-2013.l|mainlib
23.6114			DBC TIC	23.4979	23.7479	1.33012E+07	0.25	0.2805
	Trimethylsilyl octacosanoate		C31H64O2Si	1206693-36-8	682	689	496.468	essentiial oils|fiehn-2013.l|mainlib
23.9884			DBC TIC	23.9479	24.0479	6.82728E+06	0.1	0.144
	Campesterol, TMS derivative		C31H56OSi	55429-62-4	632	633	472.41	essentiial oils|fiehn-2013.l|mainlib
24.1195			DBC TIC	24.0479	24.2521	3.4527E+07	0.2042	0.7281
	Campesterol		C28H48O	474-62-4	826	828	400.371	essentiial oils|fiehn-2013.l|mainlib
25.3673			DBC TIC	25.1854	25.4521	1.10887E+08	0.2667	2.3383
	Stigmast-5-ene, 3β-(trimethylsiloxy)-, (24S)-		C32H58OSi	25873-56-7	748	749	486.426	essentiial oils|fiehn-2013.l|mainlib
25.5582			DBC TIC	25.4521	25.6396	2.62337E+08	0.1875	5.5318
	β-Sitosterol		C29H50O	83-46-5	805	815	414.386	essentiial oils|fiehn-2013.l|mainlib
26.1931			DBC TIC	26.1021	26.2562	1.53345E+06	0.1542	0.0323
	1H-3a,7-Methanoazulen-6-ol, octahydro-3,6,8,8-tetramethyl-, acetate, [3R-(3α,3aβ,6α,7β,8aα)]-		C17H28O2	77-54-3	609	641	264.209	essentiial oils|fiehn-2013.l|mainlib
27.3865			DBC TIC	27.1896	27.4854	2.47765E+08	0.2958	5.2246
	α-Amyrin		C30H50O	638-95-9	859	861	426.386	essentiial oils|fiehn-2013.l|mainlib
28.0701			DBC TIC	27.9312	28.1312	9.41148E+05	0.2	0.0198
	dl-α-Tocopherol		C29H50O2	10191-41-0	644	663	430.381	essentiial oils|fiehn-2013.l|mainlib

## Sheet: stem_acetone_CH
			Source/	Start/		End/	Area/	Width/	% Area/
			Formula	CAS		MF	RMF	Exact mass	Library
1.0214			DBC TIC	0.9979		1.0437	2.40962E+07	0.0458	0.577
	Disiloxane, hexamethyl-		C6H18OSi2	107-46-0		876	891	162.09	essentiial oils|fiehn-pct-2013.hp|mainlib
1.1513			DBC TIC	1.0437		1.1937	5.8528E+08	0.15	14.0158
	Acetamide, 2,2,2-trifluoro-N-methyl-		C3H4F3NO	815-06-5		713	759	127.024	essentiial oils|fiehn-pct-2013.hp|mainlib
1.2348			DBC TIC	1.1937		1.3104	7.95065E+08	0.1167	19.0396
	Pyridine		C5H5N	110-86-1		822	838	79.042	essentiial oils|fiehn-pct-2013.hp|mainlib
1.8042			DBC TIC	1.7771		1.8354	48286	0.0583	0.0012
	Ethylbenzene		C8H10	100-41-4		763	800	106.078	essentiial oils|fiehn-pct-2013.hp|mainlib
2.3429			DBC TIC	2.2604		2.4729	4.03548E+05	0.2125	0.0097
	Pyridine		C5H5N	110-86-1		849	855	79.042	essentiial oils|fiehn-pct-2013.hp|mainlib
2.7434			DBC TIC	2.6937		2.7604	88787	0.0667	0.0021
	Propane, 2,2-diethoxy-		C7H16O2	126-84-1		577	681	132.115	essentiial oils|fiehn-pct-2013.hp|mainlib
2.9826			DBC TIC	2.9604		3.1521	3.13293E+06	0.1917	0.075
	Glycerin		C3H8O3	56-81-5		853	853	92.047	essentiial oils|fiehn-pct-2013.hp|mainlib
	6.35 Glycerol		C3H8O3	56-81-5		706	706	92.047	essentiial oils|fiehn-pct-2013.hp|mainlib
3.4826			DBC TIC	3.4521		3.5021	46170	0.05	0.0011
	Butyl glyoxylate		C6H10O3	6295-06-3		804	886	130.063	essentiial oils|fiehn-pct-2013.hp|mainlib
3.5248			DBC TIC	3.5021		3.5687	64637	0.0667	0.0015
	Ethanol, 2-(trimethylsilyl)-		C5H14OSi	2916-68-9		644	795	118.081	essentiial oils|fiehn-pct-2013.hp|mainlib
7.0497			DBC TIC	7.0187		7.0896	2.12052E+05	0.0708	0.0051
	18.77 Nonanoic acid		C9H18O2	112-05-0		787	817	158.131	essentiial oils|fiehn-pct-2013.hp|mainlib
	Nonanoic acid		C9H18O2	112-05-0		701	710	158.131	essentiial oils|fiehn-pct-2013.hp|mainlib
9.9489			DBC TIC	9.9021		9.9854	1.46378E+05	0.0833	0.0035
	2H-Pyran-2-one, 5,6-dihydro-6-propyl-		C8H12O2	16400-69-4		753	779	140.084	essentiial oils|fiehn-pct-2013.hp|mainlib
10.2272			DBC TIC	10.1896		10.2896	5.91374E+05	0.1	0.0142
	2,4-Di-tert-butylphenol		C14H22O	96-76-4		841	841	206.167	essentiial oils|fiehn-pct-2013.hp|mainlib
10.3563			DBC TIC	10.2896		10.5062	1.01329E+07	0.2167	0.2427
	β-D-Glucopyranose, 1,6-anhydro-		C6H10O5	498-07-7		888	896	162.053	essentiial oils|fiehn-pct-2013.hp|mainlib
10.7099			DBC TIC	10.6896		10.7521	2.55952E+05	0.0625	0.0061
	2(4H)-Benzofuranone, 5,6,7,7a-tetrahydro-4,4,7a-trimethyl-		C11H16O2	15356-74-8		738	839	180.115	essentiial oils|fiehn-pct-2013.hp|mainlib
10.9032			DBC TIC	10.8521		10.9854	2.37359E+06	0.1333	0.0568
	31.47 Dodecanoic acid		C12H24O2	143-07-7		851	856	200.178	essentiial oils|fiehn-pct-2013.hp|mainlib
	Dodecanoic acid		C12H24O2	143-07-7		787	791	200.178	essentiial oils|fiehn-pct-2013.hp|mainlib
11.3674			DBC TIC	11.3187		11.4729	5.92472E+05	0.1542	0.0142
	4-Hydroxybenzoic acid, TBDMS derivative		C13H20O3Si			736	750	252.118	essentiial oils|fiehn-pct-2013.hp|mainlib
11.7671			DBC TIC	11.7187		11.8562	6.74302E+06	0.1375	0.1615
	1,3,5-Benzenetriol		C6H6O3	108-73-6		845	889	126.032	essentiial oils|fiehn-pct-2013.hp|mainlib
11.8921			DBC TIC	11.8562		12.0229	3.15014E+07	0.1667	0.7544
	Phloroglucinol, trimethylsilyl ether		C9H14O3Si	134273-02-2		821	832	198.071	essentiial oils|fiehn-pct-2013.hp|mainlib
12.1807			DBC TIC	12.1479		12.2354	2.30956E+06	0.0875	0.0553
	2,6-Dimethoxyhydroquinone		C8H10O4	15233-65-5		784	802	170.058	essentiial oils|fiehn-pct-2013.hp|mainlib
12.241			DBC TIC	12.2354		12.3354	1.35122E+05	0.1	0.0032
	2,6-Dimethoxyhydroquinone		C8H10O4	15233-65-5		612	631	170.058	essentiial oils|fiehn-pct-2013.hp|mainlib
12.577			DBC TIC	12.5646		12.5854	12887	0.0208	0.0003
	Acetamide, N-ethyl-		C4H9NO	625-50-3		843	870	87.068	essentiial oils|fiehn-pct-2013.hp|mainlib
13.4158			DBC TIC	13.3729		13.5021	4.2307E+07	0.1292	1.0131
	D-Pinitol, pentakis(trimethylsilyl) ether		C22H54O6Si5			799	799	554.277	essentiial oils|fiehn-pct-2013.hp|mainlib
13.9565			DBC TIC	13.9354		13.9687	1.54821E+05	0.0333	0.0037
	4H-1-Benzothiopyran-4-one, 2,3-dihydro-		C9H8OS	3528-17-4		665	667	164.03	essentiial oils|fiehn-pct-2013.hp|mainlib
14.8116			DBC TIC	14.8021		14.8312	1.52422E+05	0.0292	0.0037
	Isopropyl alcohol, TMS derivative		C6H16OSi	1825-64-5		638	758	132.097	essentiial oils|fiehn-pct-2013.hp|mainlib
15.0647			DBC TIC	15.0146		15.1562	7.23724E+07	0.1417	1.7331
	n-Hexadecanoic acid		C16H32O2	57-10-3		851	855	256.24	essentiial oils|fiehn-pct-2013.hp|mainlib
	45.95 Hexadecanoic acid		C16H32O2	57-10-3		837	856	256.24	essentiial oils|fiehn-pct-2013.hp|mainlib
15.4302			DBC TIC	15.4104		15.4812	1.81376E+06	0.0708	0.0434
	4H-1-Benzopyran-4-one, 5,7-dihydroxy-2-methyl-		C10H8O4	1013-69-0		787	800	192.042	essentiial oils|fiehn-pct-2013.hp|mainlib
15.5469			DBC TIC	15.4812		15.6312	1.90279E+07	0.15	0.4557
	[985] palmitic acid [18.885]		C16H32O2	64519-82-0		864	866	256.24	essentiial oils|fiehn-pct-2013.hp|mainlib
16.3791			DBC TIC	16.3604		16.4812	9.10233E+06	0.1208	0.218
	Octadecanoic acid		C18H36O2	57-11-4		840	841	284.272	essentiial oils|fiehn-pct-2013.hp|mainlib
16.5663			DBC TIC	16.5229		16.5771	7.58975E+06	0.0542	0.1818
	[5280450] linoleic acid [20.444]		C18H32O2	60-33-3		864	869	280.24	essentiial oils|fiehn-pct-2013.hp|mainlib
16.6564			DBC TIC	16.6312		16.6854	1.26228E+06	0.0542	0.0302
	Phenol, 4,4'-(1-methylethylidene)bis-		C15H16O2	80-05-7		785	788	228.115	essentiial oils|fiehn-pct-2013.hp|mainlib
16.7147			DBC TIC	16.6854		16.7687	3.63513E+06	0.0833	0.0871
	[5281] stearic acid [20.721]		C18H36O2	57-11-4		779	780	284.272	essentiial oils|fiehn-pct-2013.hp|mainlib
17.1684			DBC TIC	17.1437		17.1812	1.51262E+06	0.0375	0.0362
	Nonadecanenitrile		C19H37N	28623-46-3		764	769	279.293	essentiial oils|fiehn-pct-2013.hp|mainlib
17.4127			DBC TIC	17.3937		17.4854	2.43787E+06	0.0917	0.0584
	Eicosanoic acid		C20H40O2	506-30-9		782	796	312.303	essentiial oils|fiehn-pct-2013.hp|mainlib
17.6672			DBC TIC	17.6604		17.6812	7.60817E+05	0.0208	0.0182
	[8215] behenic acid [23.956]		C22H44O2	112-85-6		687	740	340.334	essentiial oils|fiehn-pct-2013.hp|mainlib
18.1744			DBC TIC	18.1562		18.2146	2.84329E+07	0.0583	0.6809
	[8343] dioctyl phthalate [23.116]		C24H38O4	117-81-7		885	888	390.277	essentiial oils|fiehn-pct-2013.hp|mainlib
	Bis(2-ethylhexyl) phthalate		C24H38O4	117-81-7		868	871	390.277	essentiial oils|fiehn-pct-2013.hp|mainlib
18.5479			DBC TIC	18.4937		18.5771	1.07697E+06	0.0833	0.0258
	[8215] behenic acid [23.956]		C22H44O2	112-85-6		641	729	340.334	essentiial oils|fiehn-pct-2013.hp|mainlib
19.6622			DBC TIC	19.6271		19.7396	2.61669E+06	0.1125	0.0627
	[8215] behenic acid [23.956]		C22H44O2	112-85-6		705	815	340.334	essentiial oils|fiehn-pct-2013.hp|mainlib
19.9008			DBC TIC	19.8396		20.0187	1.03986E+06	0.1792	0.0249
	γ-Tocopherol		C28H48O2	7616-22-0		617	656	416.365	essentiial oils|fiehn-pct-2013.hp|mainlib
20.741			DBC TIC	20.6687		20.7854	3.902E+06	0.1167	0.0934
	δ-Tocopherol		C27H46O2	119-13-1		806	810	402.35	essentiial oils|fiehn-pct-2013.hp|mainlib
21.2495			DBC TIC	21.2312		21.2979	1.21647E+06	0.0667	0.0291
	[8215] behenic acid [23.956]		C22H44O2	112-85-6		683	763	340.334	essentiial oils|fiehn-pct-2013.hp|mainlib
21.7419			DBC TIC	21.6771		21.8646	4.46601E+07	0.1875	1.0695
	γ-Tocopherol		C28H48O2	7616-22-0		652	652	416.365	essentiial oils|fiehn-pct-2013.hp|mainlib
22.3468			DBC TIC	22.3229		22.4229	7.24456E+06	0.1	0.1735
	1-Octacosanol, TMS derivative		C31H66OSi	959269-04-6		649	657	482.488	essentiial oils|fiehn-pct-2013.hp|mainlib
23.6594			DBC TIC	23.5687		23.7354	3.6417E+06	0.1667	0.0872
	[8215] behenic acid [23.956]		C22H44O2	112-85-6		750	827	340.334	essentiial oils|fiehn-pct-2013.hp|mainlib
24.1708			DBC TIC	24.0896		24.2896	8.46682E+07	0.2	2.0276
	Campesterol		C28H48O	474-62-4		835	837	400.371	essentiial oils|fiehn-pct-2013.hp|mainlib
25.4334			DBC TIC	25.3604		25.5104	3.40751E+07	0.15	0.816
	[5321342] beta-sitosterol [28.925]		C29H50O	83-46-5		789	791	414.386	essentiial oils|fiehn-pct-2013.hp|mainlib
25.6408			DBC TIC	25.5104		25.7729	3.92643E+08	0.2625	9.4027
	β-Sitosterol		C29H50O	83-46-5		783	793	414.386	essentiial oils|fiehn-pct-2013.hp|mainlib
25.817			DBC TIC	25.7729		25.8687	8.29228E+06	0.0958	0.1986
	Stigmastanol		C29H52O	19466-47-8		694	697	416.402	essentiial oils|fiehn-pct-2013.hp|mainlib
27.4565			DBC TIC	27.2521		27.5521	2.78021E+08	0.3	6.6578
	α-Amyrin		C30H50O	638-95-9		848	850	426.386	essentiial oils|fiehn-pct-2013.hp|mainlib
